1 **The Envelope Proteome Changes Driven by RamA Overproduction in *Klebsiella***  
2 ***pneumoniae* that Enhance Acquired  $\beta$ -Lactam Resistance.**

3

4 Juan-Carlos JIMÉNEZ-CASTELLANOS<sup>1</sup>, Wan Ahmad Kamil WAN NUR ISMAH<sup>1,2</sup>, Yuiko  
5 TAKEBAYASHI<sup>1</sup>, Jacqueline FINDLAY<sup>1</sup>, Thamarai SCHNEIDERS<sup>3</sup>, Kate J. HEESOM<sup>4</sup> & Matthew B.  
6 AVISON<sup>1,\*</sup>

7

8 <sup>1</sup>School of Cellular and Molecular Medicine, University of Bristol, Bristol, United Kingdom

9 <sup>2</sup>Faculty of Biotechnology & Biomolecular Sciences, Universiti Putra Malaysia, Selangor Darul  
10 Ehsan, Malaysia.

11 <sup>3</sup>Division of Infection and Pathway Medicine, University of Edinburgh, Edinburgh, United  
12 Kingdom.

13 <sup>4</sup>University of Bristol Proteomics Facility, Bristol. United Kingdom.

14

15 \*Corresponding author. Mailing address: School of Cellular and Molecular Medicine, University  
16 of Bristol, Biomedical Sciences Building, University Walk, Bristol, BS8 1TD, United Kingdom. Tel:  
17 +44(0)1173312036, Fax +44(0)1179287896. E-mail: Matthewb.Avison@bristol.ac.uk.

18

19 **Running Title:** RamA enhanced  $\beta$ -lactam resistance in *Klebsiella pneumoniae*

20

21

22

23 **Abstract**

24 **OBJECTIVES**

25 **In *Klebsiella pneumoniae*, overproduction of RamA results in reduced envelope permeability**  
26 **and reduced antimicrobial susceptibility but clinically relevant resistance is rarely observed.**  
27 **Here we have tested whether RamA over-production can enhance acquired  $\beta$ -lactam**  
28 **resistance mechanisms in *K. pneumoniae* and have defined the envelope protein abundance**  
29 **changes seen upon RamA overproduction during growth in low and high osmolarity media.**

30 **METHODS**

31 **Envelope permeability was estimated using a fluorescent dye accumulation assay. Antibiotic**  
32 **susceptibility was measured using disc testing. Total envelope protein production was**  
33 **quantified using LC-MS/MS proteomics and transcript levels quantified by Real Time RT-PCR.**

34 **RESULTS**

35 **RamA overproduction enhanced  $\beta$ -lactamase mediated  $\beta$ -lactam resistance, in some cases**  
36 **dramatically, without altering  $\beta$ -lactamase production. It increased production of efflux**  
37 **pumps and decreased OmpK35 porin production, though *micF* over-expression showed that**  
38 **OmpK35 reduction has little impact on envelope permeability. A survey of *K. pneumoniae***  
39 **bloodstream isolates revealed *ramA* hyperexpression in 3 out of 4 carbapenemase producers,**  
40 **1/21 CTX-M producers and 2/19 strains not carrying CTX-M or carbapenemases.**

41 **CONCLUSIONS**

42 **Whilst RamA is not a key mediator of antibiotic resistance in *K. pneumoniae* on its own, it is**  
43 **potentially important for enhancing the spectrum of acquired  $\beta$ -lactamase mediated  $\beta$ -lactam**  
44 **resistance. LC-MS/MS proteomics analysis has revealed that this enhancement is achieved**  
45 **predominantly through activation of efflux pump production.**

46

## 47 Introduction

48 RamA is a global transcriptional activator <sup>1</sup> found in, amongst other Enterobacteriaceae:  
49 *Salmonella* spp.,<sup>2</sup> *Enterobacter* spp.<sup>1,3</sup> and *Klebsiella* spp.<sup>1,4</sup> but not *Escherichia coli*. Where  
50 characterised, RamA has revealed a function comparable to *E. coli* MarA.<sup>1-5</sup> In wild-type  
51 *Klebsiella pneumoniae*, at least under standard laboratory growth conditions, production of  
52 RamA is low because of RamR, a transcriptional repressor that occludes the *ramA* promoter.<sup>6</sup> In  
53 some clinical isolates, RamA is overproduced due to de-repressing mutations in *ramR*.<sup>7-10</sup> RamA  
54 activates the transcription of a regulon including *oqxAB* and *acrAB*, encoding the components  
55 of two tripartite antimicrobial drug efflux pumps, and *tolC*, which encodes the outer membrane  
56 protein used by both.<sup>4</sup>

57 Overexpression of *ramA* in *K. pneumoniae* isolates that lack other antibiotic resistance  
58 mechanisms increases MICs of a wide range of antimicrobials, including cephalosporins but not  
59 carbapenems. However, even overexpressing *ramA* >1000 fold only confers clinically relevant  
60 resistance to one or two antimicrobials and only in some isolates.<sup>5</sup> On its own, therefore, RamA  
61 is not a key resistance determinant in *K. pneumoniae*, however RamA over-producing clinical  
62 isolates can carry acquired resistance mechanisms, particularly plasmid encoded  $\beta$ -  
63 lactamases.<sup>11</sup> Accordingly, the first aim of the work presented here was to determine whether  
64 RamA overproduction can enhance the spectrum of resistance conferred by acquired  $\beta$ -  
65 lactamases. We also wanted to test whether *ramR* loss of function mutations are more  
66 common in cephalosporinase or carbapenemase producing *K. pneumoniae* clinical isolates than  
67 in isolates that do not carry these types of enzymes.

68 We were particularly keen to investigate whether RamA-mediated reduced carbapenem  
69 susceptibility occurs in isolates producing ESBLs or AmpC type cephalosporinases. The rationale

70 underlying this aim was based on our previous observation of RamA-mediated OmpK35  
71 downregulation,<sup>4,5</sup> as loss of function mutations in OmpK35 have previously been shown to  
72 increase carbapenem MICs against *K. pneumoniae* isolates carrying ESBLs or AmpC  $\beta$ -  
73 lactamases.<sup>12</sup>

74 The enhancement of  $\beta$ -lactam MICs seen following OmpK35 loss of function in a  
75 cephalosporinase producing *K. pneumoniae* is reportedly minimised during growth in high  
76 osmolarity Muller Hinton media, which is the medium of choice for most antibiotic  
77 susceptibility testing protocols,<sup>13</sup> but is maximised during growth in low osmolarity Nutrient  
78 media. This is because these media reportedly support different basal OmpK35 levels, as  
79 defined using outer membrane protein profiling and SDS-PAGE.<sup>12</sup> Accordingly, we also set out  
80 to define the envelope proteome changes stimulated by RamA overproduction in Muller Hinton  
81 broth and Nutrient broth using a much more discriminatory and accurate methodology:  
82 Orbitrap liquid chromatography tandem mass spectrometry (LC-MS/MS). The aim was to  
83 identify common and growth medium-specific effects of RamA overproduction, and to confirm  
84 a previous report that basal OmpK35 levels are different in the two media.<sup>12</sup> Finally, we set out  
85 to define the contribution of RamA-mediated OmpK35 downregulation to the overall effect of  
86 RamA overproduction on envelope permeability and antibiotic susceptibility in *K. pneumoniae*.

87

88

89

90

91

## 92 **Materials and Methods**

### 93 *Bacterial strains and antibiotic susceptibility testing*

94 *E. coli* TOP10 (Invitrogen, Leek, The Netherlands), 44 non-replicate *K. pneumoniae* human  
95 bloodstream isolates having various antimicrobial susceptibility profiles (provided by Dr Karen  
96 Bowker, Department of Microbiology, North Bristol NHS Trust), *K. pneumoniae* NCTC5055  
97 transformants carrying pBAD(*ramA*) or a pBAD vector only control plasmid<sup>5</sup> and the otherwise  
98 isogenic pair ECL8<sup>1</sup> and ECL8Δ*ramR*<sup>4</sup> were used throughout. Disc susceptibility testing was  
99 performed according to CLSI methodology<sup>13</sup> and interpreted using CLSI performance  
100 standards.<sup>14</sup>

101

### 102 *Cloning plasmid-mediated β-lactamase genes and micF and sequencing ramR*

103 Cloning *bla*<sub>NDM-1</sub> (with its IS*Aba125* promoter) into the cloning vector pSU18<sup>15</sup> has previously  
104 been reported.<sup>16</sup> *K. pneumoniae micF* and the following additional β-lactamase genes were  
105 synthesised or amplified by PCR from the sources and using the primers listed in Table S1 and  
106 the PCR method previously described<sup>17</sup> in such a way as to include their native promoters:  
107 *bla*<sub>IMP-1</sub> and *bla*<sub>VIM-1</sub> (with hybrid and weak strength class 1 integron promoters, respectively),<sup>18</sup>  
108 *bla*<sub>CTX-M1</sub> and *bla*<sub>CMY-4</sub> (with IS*Ecp1* promoters), *bla*<sub>KPC-3</sub> (with IS*Kpn7* promoter) and *bla*<sub>OXA-48</sub>  
109 (with IS*1999* promoter). Some PCR amplicons were TA cloned into the pCR2.1-TOPO cloning  
110 vector (Invitrogen) according to the manufacturer's instructions. These pCR2.1 inserts, removed  
111 by restriction enzyme digestion, and other PCR amplicons directly cut with restriction enzymes,  
112 were ligated into the pSU18<sup>15</sup> or pK18<sup>19</sup> cloning vectors as illustrated in Table S1. Plasmids  
113 were used to transform *K. pneumoniae* isolates to chloramphenicol or kanamycin (30 mg/L)  
114 resistance for pSU18 and pK18, respectively, using electroporation as standard for lab strain *E.*

115 *coli*. To sequence *ramR* from clinical isolates, the gene was first amplified by PCR as previously  
116 <sup>17</sup> and sequenced using the primers recorded in Table S1. Sequence alignment and analysis  
117 were performed using the online ClustalOmega (<http://www.ebi.ac.uk/Tools/msa/clustalo/>)  
118 multiple sequence alignment program to determine the *ramR* mutations in the isolates relative  
119 to the reference sequence *K. pneumoniae* Ecl8 (Accession Number HF536482.1).

120

#### 121 *Growth of cultures for all experiments*

122 Each strain or transformant was inoculated into a separate batch of 50 mL Cation Adjusted  
123 Muller-Hinton Broth (Sigma) or Nutrient Broth (Oxoid) containing appropriate selection in a 250  
124 mL foam stoppered flask to an initial Optical Density at 600 nm (OD<sub>600</sub>) of ≈0.05. Cultures were  
125 incubated with shaking (160 rpm) until the OD<sub>600</sub> had reached 0.5-0.7.

126

#### 127 *Fluorescent Hoechst (H) 33342 dye accumulation assay*

128 Envelope permeability was estimated as described previously <sup>5</sup> in bacteria grown in liquid  
129 culture using an established fluorescent dye accumulation assay <sup>20</sup> with black flat-bottomed 96-  
130 well plates (Greiner Bio-one, Stonehouse, UK) and a Fluostar Optima (Aylesbury, UK) plate  
131 reader. H33342 (Sigma) was used at a final concentration of 2.5 μM.

132

#### 133 *Characterisation of Envelope Proteomes and Real-Time RT-PCR*

134 Methods used for protein and RNA extraction and analysis of abundance were almost identical  
135 to those used previously <sup>5</sup> and are presented in detail in Supplementary Material. For each LC-  
136 MS/MS proteomics experiment, raw protein abundance data were collected for three biological  
137 replicates of each growth condition. The significance of any observed difference between the

138 means of the triplicate abundance data for one protein in two different growth conditions was  
139 calculated using a T-test comparing the raw abundance data as described in Supplementary  
140 Material.

141

142 *β-Lactamase assays and multiplex PCR for β-lactamase gene carriage.*

143 Multiplex PCRs were performed for (i) carbapenemase genes encoding the IMP, VIM, OXA-48-  
144 like, NDM and KPC enzymes,<sup>21</sup> though the NDM and OXA-48 like gene identifying PCRs were run  
145 separately and not as a multiplex with the rest (ii) genes encoding CTX-M groups 1, 2, 8, 9 and  
146 25<sup>22</sup> (iii) a bespoke multiplex for genes encoding TEM-1, SHV, OXA-1 and CMY. All multiplex  
147 PCR primers and expected product sizes are recorded in Table S2. DNA template was prepared  
148 as previously described<sup>17</sup> and 1 μL of supernatant used in a final PCR reaction volume of 25 μL  
149 consisting of 12.5 μL REDTaq ReadyMix (Sigma) with 10 μM of each primer. PCR was performed  
150 using the following conditions: 94°C for 10 min, 35 cycles of amplification consisting of 94°C for  
151 1 min, 52-56°C for 1 min, 72°C for 1 min 30 s and a final extension at 72°C for 10 min.

152 β-Lactamase assays were performed as follows: overnight cultures of bacteria were  
153 diluted to an optical density at 600 nm (OD<sub>600</sub>) of 0.1 in Muller-Hinton broth and grown at 37°C  
154 until the OD<sub>600</sub> was 0.8 before cell extracts were prepared and levels of β-lactamase activity in  
155 cell extracts measured as described previously<sup>23</sup> using 100 μM nitrocefin as a substrate. Linear  
156 gradients (ΔAU/min) were extrapolated and an extinction coefficient of 17,400 AU/M was used  
157 to calculate nitrocefin hydrolysing activity. The total protein concentration in each cell extract  
158 was quantified using the Bio-Rad protein assay reagent (Bio-Rad, Hemel Hempstead, United  
159 Kingdom) according to the manufacturer's instructions and used to calculate relative specific  
160 enzyme activity (pmol/min/μg) in each cell extract.

## 161 **Results and Discussion**

162 *Enhancement of  $\beta$ -lactam resistance in *K. pneumoniae* by RamA in the presence of acquired  $\beta$ -*  
163 *lactamases*

164 A library of seven clinically important mobile  $\beta$ -lactamase genes was created using  
165 pSU18, a broad host-range, low copy number vector.<sup>15</sup> Each gene was expressed from a native  
166 promoter commonly seen in clinical isolates to give close to wild-type levels of  $\beta$ -lactamase  
167 production (see table S1). Once used to transform *K. pneumoniae* Ecl8 and Ecl8 $\Delta$ ramR,<sup>4,5</sup> this  
168 library allowed us to compare the relative importance of these mobile  $\beta$ -lactamase genes and  
169 the additional impact of overproducing RamA on  $\beta$ -lactam resistance. It is important to note  
170 that there was no significant change in  $\beta$ -lactamase production in Ecl8 $\Delta$ ramR transformants  
171 versus Ecl8 transformants carrying the same  $\beta$ -lactamase gene (Table S3)

172 Ecl8 is susceptible to 17/18 tested  $\beta$ -lactams (Table 1). Overproduction of RamA (i.e.  
173 Ecl8 $\Delta$ ramR) reduced zone diameters  $\geq 2$  mm for 13/18 tested  $\beta$ -lactams, but clinically relevant  
174 non-susceptibility (resistance or intermediate resistance based on CLSI breakpoints)<sup>14</sup> was not  
175 achieved for any of them (Table 1). Introduction of  $\beta$ -lactamase genes into Ecl8 had significant  
176 effects on  $\beta$ -lactam susceptibility, as expected. The metallo- $\beta$ -lactamases (MBLs) NDM-1 and  
177 IMP-1 rendered Ecl8 non-susceptible to 17/18 and 14/18  $\beta$ -lactams, respectively. Because of  
178 this, it was difficult to see any additional effect that might be conferred by RamA  
179 overproduction (Table 1). Accordingly, the gene encoding VIM-1 was deliberately cloned with a  
180 weak integron promoter and the resultant low-level MBL production meant that Ecl8 remained  
181 susceptible to 12/18 test  $\beta$ -lactams. In this case, the effect of RamA overproduction was  
182 profound. Ecl8 $\Delta$ ramR (VIM-1) was only susceptible to aztreonam and cefotetan; importantly, 10



183  $\beta$ -lactams were rendered ineffective by RamA overproduction in the presence of low-level MBL  
184 activity (Table 1).

185         The possibility that reduced envelope permeability can enhance the ability of serine  
186 active site  $\beta$ -lactamases (SBLs) such as CTX-M or AmpC type cephalosporinases to confer  
187 carbapenem resistance in *K. pneumoniae* has previously been suggested.<sup>12</sup> We found evidence  
188 that this is correct, but only for ertapenem. Ecl8 remained susceptible to  $\beta$ -lactam/ $\beta$ -lactamase  
189 inhibitor combinations, cephamycins and carbapenems when carrying CTX-M1. Susceptibility to  
190 all these  $\beta$ -lactam classes was retained following overproduction of RamA. There was a  
191 considerable zone diameter reduction for ertapenem (by 7 mm; on the verge of being non-  
192 susceptible) but for the other carbapenems, no change at all. In the case of the AmpC-type SBL  
193 CMY-4, ertapenem resistance was conferred when RamA was overproduced, though the other  
194 carbapenems remained equally active against Ecl8 $\Delta ramR$  (CMY-4) as against Ecl8 (CMY-4).  
195 Finally, we tested SBLs with carbapenemase activity. In Ecl8 carrying KPC-3, only the  
196 cephamycins retained activity, but even these were lost following overproduction of RamA,  
197 underlining the threat of this broad-spectrum enzyme. In contrast, the effect of carrying OXA-  
198 48 on  $\beta$ -lactam resistance was relatively weak. When RamA was overproduced there was some  
199 inhibition zone diameter reduction, particularly for the carbapenems, but Ecl8 $\Delta ramR$ (OXA-48)  
200 remained susceptible to 17/18  $\beta$ -lactams (Table 1).

201

202 *A survey of ramR function in clinical isolates carrying or not carrying cephalosporinases and*  
203 *carbapenemases.*

204 In order to perform a survey of *ramR* mutation in *K. pneumoniae*, 44 bloodstream isolates were  
205 randomly collected. PCR was used to determine *ramR* sequence in these isolates. Nine isolates

206 had mutations in *ramR*, (in comparison with Ecl8), in addition to a mutation encoding the  
207 Thr141Ile variant, seen in several isolates, which is known to arise via genetic drift and has no  
208 impact on phenotype.<sup>9</sup> Two of the isolates carried the same *ramR* mutation, encoding a  
209 Ala19Val variant. To confirm which of the eight different mutations reduce the repressor  
210 function of RamR, and therefore caused hyperexpression of *ramA*, we used quantitative Real-  
211 Time RT-PCR to measure *ramA* transcript levels in comparison with the *ramR* wild-type isolate  
212 AE. Six of the mutants hyper-expressed *ramA* with a range of 4.3-fold to 70.6-fold more than in  
213 wild-type clinical isolate AE (Table S4).

214 To see if there was any linkage between *ramR* mutation and carriage of  $\beta$ -lactamase  
215 genes, three multiplex PCRs were performed to categorise the  $\beta$ -lactamase genes present in  
216 each of the 44 bloodstream isolates. Four carried at least one carbapenemase gene, of which  
217 two also carried *bla*<sub>CTX-M</sub>; 21 additional isolates carried *bla*<sub>CTX-M</sub>. All CTX-M genes were of group  
218 1. The remaining 19 isolates did not carry any cephalosporinase or carbapenemase gene (Table  
219 S4).

220 Finally, disc susceptibility testing was performed for eight  $\beta$ -lactams against the 44  
221 clinical isolates. Using the sum of all the inhibition zone diameters to represent the combined  $\beta$ -  
222 lactam susceptibility for each isolate, we ranked the isolates (Table S4). Not surprisingly the  
223 four carbapenemase gene positive isolates were the four least  $\beta$ -lactam susceptible isolates  
224 overall. Nonetheless, it was striking to find that 3 out of 4 of these isolates also hyperexpress  
225 *ramA* because of a *ramR* mutation. Only one of the 21 carbapenemase negative, CTX-M positive  
226 isolates hyper-expressed *ramA*; but this isolate (isolate T) was by far the least susceptible  
227 isolate in this group. As predicted from our transformation experiments, loss of RamR repressor  
228 activity in a CTX-M positive background (isolate T) reduced carbapenem susceptibility relative

229 to the 20 isolates that have CTX-M but an intact *ramR*. However, this effect (Table S4) was  
230 greater than that seen in the Ecl8/Ecl8 $\Delta$ *ramR* transformants (Table 1), with resistance to  
231 ertapenem, and intermediate resistance to doripenem being observed in isolate T, together  
232 with reduced susceptibility to meropenem. There must be some additional mechanism at play  
233 in isolate T not seen in Ecl8. As seen with Ecl8 $\Delta$ *ramR* (Table 1) loss of RamR repressor activity in  
234 the two clinical isolates that lack any cephalosporinase or carbapenemase genes had minimal  
235 impact on  $\beta$ -lactam susceptibility in comparison with the *ramR* wild-type isolates (Table S4)

236

237 *Envelope Proteome Changes Following RamA Overproduction in K. pneumoniae in NB and MHB*  
238 *and Impact on Envelope Permeability*

239 We have recently shown using LC-MS/MS proteomics that RamA overproduction in *K.*  
240 *pneumoniae* NCTC5055 using a pBAD expression plasmid increased the production of two efflux  
241 pumps: AcrAB-TolC and OqxAB-TolC.<sup>5</sup> To obtain a more detailed understanding of the RamA  
242 regulon, we used Orbitrap LC-MS/MS proteomics to generate a comprehensive list of envelope  
243 proteins whose production is altered upon RamA overproduction. Table S5 shows summary  
244 data for the *K. pneumoniae* Ecl8/Ecl8 $\Delta$ *ramR* otherwise isogenic pair during growth in Muller-  
245 Hinton Broth (MHB). It has previously been reported that low osmolarity media such as nutrient  
246 broth (NB) affects the levels of OmpK35 relative to growth in high osmolarity media such as  
247 MHB.<sup>12</sup> This observation is potentially important because OmpK35 levels might impact on  
248 envelope permeability and because antimicrobial susceptibility assays are generally performed  
249 using Muller-Hinton media. Accordingly, to see whether medium osmolarity affects the impact  
250 of RamA overproduction and to quantify the effect of medium choice on OmpK35 levels, we

251 also compared envelope proteome changes in the Ecl8/Ecl8 $\Delta ramR$  pair during growth in NB  
252 (Table S6).

253 Our LC-MS/MS methodology allowed identification and absolute quantification with a  
254 high degree of certainty ( $\geq 3$  peptides identified) of 655 and 494 proteins in envelope  
255 preparations from cells grown in MHB and NB, respectively (see supplementary proteomics  
256 data file). Previous data from SDS-PAGE analysis of outer membrane protein preparations have  
257 been interpreted as meaning that OmpK35 levels increase upon shifting from MHB to NB and  
258 that OmpK36 levels remain constant.<sup>12</sup> However, because the same amount of total protein  
259 was loaded in each SDS-PAGE well, it is not possible to quantify either OmpK35 or OmpK36 in  
260 absolute terms, only the ratio of the two can be estimated. Our LC-MS/MS data did confirm this  
261 earlier finding<sup>12</sup> that there is a shift in the OmpK36:OmpK35 ratio in Ecl8 from 1.7:1 (calculated  
262 from mean protein abundance data,  $p=0.013$ ,  $n=3$ ) during growth in MHB to 1.1:1 ( $p=0.45$ ,  $n=3$ )  
263 during growth in NB. However, our absolute abundance data revealed that this change in  
264 OmpK36:OmpK35 ratio is achieved through downregulation of OmpK36 (2.2-fold,  $p=0.011$ ,  $n=3$ )  
265 not upregulation of OmpK35 (0.7-fold,  $p=0.16$ ,  $n=3$ ) during growth in NB relative to growth in  
266 MHB (see supplementary proteomics data file).

267 Twenty-nine proteins were found to be  $\geq 2$ -fold up or down regulated in Ecl8 $\Delta ramR$   
268 versus Ecl8 following application of our statistical significance cut-off ( $p<0.05$  for a T-test  
269 comparing absolute protein abundance data,  $n=3$ ) during growth in MHB, and 33 proteins were  
270 differentially regulated during growth in NB (Tables S5, S6 and additional supplementary  
271 proteomics data file). Of these, 12 proteins were similarly regulated in both media; 11  
272 upregulated, with only the OmpK35 porin being downregulated (Table 2). Ten out of 11  
273 proteins upregulated in Ecl8 $\Delta ramR$  in both media were also upregulated in *K. pneumoniae*

274 strain NCTC5055 following overproduction of RamA via the pBAD expression plasmid (Table S7).  
275 These 10 core upregulated proteins represent two efflux pumps (AcrAB and OqxAB, together  
276 with the outer membrane efflux protein TolC). The remaining proteins are poorly characterised  
277 and their precise role in RamA mediated permeability change is currently under investigation.

278         Of the medium-specific impacts of RamA overproduction, two are striking. In MHB only,  
279 downregulation of several proteins encoded by the maltose transport operon occurs (Table S5).  
280 The LamB2 porin is amongst these. Interestingly, its loss by mutation has been implicated in  
281 reduced carbapenem entry in *K. pneumoniae*,<sup>25,26</sup> so it is conceivable that downregulation of  
282 LamB2 might enhance the impact of RamA overproduction on carbapenem MICs during growth  
283 on Muller-Hinton agar, which is apparent in the presence of certain plasmid-mediated  $\beta$ -  
284 lactamases (Table 1, Table S4). In NB only, the efflux pump AcrEF is upregulated in *Ecl8 $\Delta$ ramR*  
285 relative to *Ecl8*. Whilst this pump has not been specifically characterised in *K. pneumoniae*, its  
286 equivalent has a role in antimicrobial resistance in other enteric bacteria, and it is part of the  
287 *Salmonella* RamA regulon.<sup>2</sup> Also upregulated in NB only is the transporter complex proteins  
288 YrbCDEF (Table S6). YrbB, which is encoded in the same operon was below the level of  
289 detection by the LC-MS/MS instrument, so we cannot say whether it was upregulated or not,  
290 but it seems a likely scenario. RamA-mediated regulation of the *yrb* locus has previously been  
291 demonstrated using transcriptome analyses in both *K. pneumoniae*<sup>4</sup> and *S. typhimurium*<sup>2</sup> and a  
292 potential RamA binding site has been proposed for the *yrb* locus in *K. pneumoniae*.<sup>4</sup> The four  
293 Yrb proteins upregulated in *Ecl8 $\Delta$ ramR* have >90% identity to the MlaCDEF proteins, part of the  
294 MlaABCDEF ABC transporter from *E. coli*, which has recently been shown to play an important  
295 role in retrograde phospholipid trafficking. The perturbation of the phospholipid content of the  
296 outer membrane is likely to result in a reduction in the sensitivity of the outer membrane to

297 chemical damage, and may also affect antimicrobial/cell affinity, reducing rate of entry.<sup>27-29</sup> The  
298 AcrEF and Yrb (Mla) proteins were also upregulated following RamA overproduction from the  
299 pBAD expression vector in *K. pneumoniae* NCTC, but LamB2 is not downregulated (Table S6).  
300 These NCTC5055 data were collected during growth in NB, which explains these findings, and  
301 confirms the medium dependence of the effects.

302 Despite these differences in envelope proteome seen during growth of Ecl8Δ*ramR* in  
303 MHB and NB, there is little impact of growth media on RamA-mediated envelope permeability  
304 reduction. As measured using fluorescent dye accumulation, envelope permeability reduces by  
305 ≈75% in Ecl8Δ*ramR* versus Ecl8 during growth in MHB and ≈65% during growth in NB (Fig. 1A).

306 Overall, based on our test of significance, 51 proteins were differentially regulated in  
307 NCTC5055 carrying pBAD(*ramA*) versus the pBAD control transformant during growth in the  
308 presence of 0.2% w/v arabinose, which stimulates RamA overproduction (Table S7). This is  
309 more than the number of proteins differentially regulated in Ecl8Δ*ramR* versus Ecl8 (Tables S5,  
310 S6). However, according to Real Time RT-PCR analysis there was 9200 +/- 390 fold (mean +/-  
311 SEM, *n*=3) more *ramA* transcript in NCTC5055::pBAD(*ramA*) than in NCTC5055 carrying the  
312 pBAD control transformant when grown in the presence of 0.2% (w/v) arabinose, as shown  
313 previously.<sup>5</sup> This is dramatically more than that seen for the “natural” RamA overproducing  
314 mutant Ecl8Δ*ramR*, where there is 6.7 +/- 2.2 fold (mean +/- SEM, *n*=3) more *ramA* transcript  
315 than in Ecl8, and ≈100-fold more than even the most *ramA* overexpressing clinical isolate in our  
316 collection (Table S4). Hence the additional proteomic differences seen in NCTC:pBAD(*ramA*) are  
317 likely to be due to spurious occupation of regulatory binding sites by the greatly overproduced  
318 RamA, which has previously been reported for *Salmonella* RamA.<sup>2</sup>

319

320 *Role of micF in RamA Mediated Control of OmpK35 Levels.*

321 There is clear downregulation of OmpK35 porin production following RamA over-production in  
322 Ecl8 (Table 2). By analogy with the situation in *E. coli* following over-production of MarA,  
323 reduction in OmpK35 levels is likely to be due to transcriptional upregulation of *micF* by RamA.  
324 To test whether the short *micF* regulatory RNA can control OmpK35 levels in *K. pneumoniae*,  
325 we cloned the *micF* gene, with its own promoter into a high-copy vector pK18<sup>19</sup> and introduced  
326 this recombinant into Ecl8 to boost *micF* transcript levels *in trans*. LC-MS/MS confirmed that  
327 OmpK35 levels are downregulated (0.39 fold,  $p=0.005$ ,  $n=3$ ) in Ecl8(*micF*) compared with  
328 Ecl8(pK18) during growth in MHB; almost the same downregulation seen in Ecl8 $\Delta$ *ramR*  
329 compared with Ecl8 during growth in MHB (0.43 fold,  $p=0.007$ ,  $n=3$  [Table 2]). However, dye  
330 accumulation assays revealed *micF* mediated OmpK35 downregulation increases the steady  
331 state level of fluorescence so that it is approximately 20% more in Ecl8(*micF*) than in the  
332 Ecl8(pK18) control transformant. Surprisingly, therefore, there is a slight increase, not a  
333 decrease in overall envelope permeability in the *micF* over-expressing recombinant (Fig 1B).  
334 Disc susceptibility testing confirmed that this increase in envelope permeability is sufficient to  
335 increase antibiotic inhibition zones against Ecl8(*micF*) (Table S8).

336 We hypothesised that the reason for this increase in envelope permeability (Fig. 1B)  
337 despite OmpK35 levels being reduced is that *K. pneumoniae* responds to reduced OmpK35  
338 levels by downregulating efflux pump production or upregulating porin production to balance  
339 envelope permeability. A reciprocal effect: downregulation of OmpK35 in *K. pneumoniae* having  
340 reduced AcrAB-TolC-mediated efflux has recently been reported.<sup>30</sup> In support of our  
341 hypothesis, RT-PCR showed that *acrA* levels are reduced in Ecl8(*micF*) versus Ecl8(pK18) (0.53  
342 +/- 0.07 fold [mean +/- SEM,  $n=3$ ]), and this was confirmed by LC/MS-MS to reduce AcrA

343 protein levels (0.62 fold,  $p=0.05$ ,  $n=3$ ). No porin proteins were seen to be upregulated (data not  
344 shown). In fact OmpC is downregulated (0.57 fold,  $p=0.02$ ,  $n=3$ ), as is OmpA (0.61 fold,  $p=0.03$ ,  
345  $n=3$ ).

346 Interestingly, downregulation of *ramA* transcription was seen using Real Time RT-PCR in  
347 Ecl8(*micF*) compared with Ecl8(pK18) (0.09 +/- 0.04 fold [mean +/- SEM,  $n=3$ ]). It is possible,  
348 therefore, that RamA downregulation may be responsible for the downregulation of AcrA seen  
349 in response to *micF*-mediated OmpK35 downregulation. If correct, this is suggestive of a  
350 feedback mechanism by which the cell can sense the balance of different factors affecting  
351 envelope permeability and control RamA production as necessary.

352

### 353 *Conclusions*

354 RamA overproduction is seen in *K. pneumoniae* clinical isolates,<sup>8</sup> though a widespread random  
355 screen has not previously been used to determine the frequency that this occurs in general.  
356 Instead, RamA overproduction has been associated with resistance to specific antimicrobials,  
357 e.g. tigecycline.<sup>9</sup> The data presented here lead us to suggest that RamA overproduction might  
358 also be selected in *K. pneumoniae* isolates with acquired  $\beta$ -lactamases, which are very common  
359 in the clinic. The effect on carbapenem resistance in *K. pneumoniae* carrying a weakly  
360 expressed *bla*<sub>VIM-1</sub> gene was particularly pronounced, and it was striking to see *ramA*  
361 hyperexpression in 3/4 carbapenemase producing bloodstream isolates from a randomly  
362 selected collection (Table S4). It was also particularly concerning to see the generation of  
363 ertapenem resistance following loss of RamR repressor activity in combination with an AmpC-  
364 type enzyme in Ecl8 (Table 1) and in a *ramA* overexpressing clinical isolate carrying CTX-M  
365 (Table S4). There may be other ways by which RamA overproduction can be beneficial; for



366 example, it may be a prerequisite for the selection of other resistance-causing mutation events  
367 such as target site mutations or those which cause porin loss, e.g. in OmpK36.

368 LC-MS/MS data presented here show that the primary phenotypic effect of RamA  
369 overproduction is mediated by enhanced efflux pump production. There is reduced OmpK35  
370 porin levels, and this can be replicated by overexpressing *micF*, but its effect on antimicrobial  
371 susceptibility is low, possibly because of the actions of regulatory feedback cascades. The  
372 proteomics methodology we have pioneered for this work has the potential to allow detailed  
373 analysis of these and other regulatory cascades in *K. pneumoniae* and other bacteria and may  
374 be useful for identifying proteome changes associated with certain resistance phenotypes in  
375 clinical isolates and resistant mutants, thereby allowing prediction of resistance profile and  
376 mechanism of resistance.

377

### 378 **Acknowledgements**

379 We are grateful to Dr Aisha M. Al-Amri, who made the *bla*<sub>IMP-1</sub> recombinant plasmid used in this  
380 study.

381

### 382 **Funding**

383 This work was funded by grant MR/N013646/1 to M.B.A and K.J.H and grant NE/N01961X/1 to  
384 MBA from the Antimicrobial Resistance Cross Council Initiative supported by the seven research  
385 councils. J-C. J-C. was funded by a postgraduate scholarship from CONACyT, Mexico. W. A. K W.  
386 N. I. was funded by a postgraduate scholarship from the Malaysian Ministry of Education.

387

### 388 **Transparency Declaration**

389 None to declare – All authors.

390

391 **References**

392

- 393 1. George AM, Hall RM, Stokes HW. Multidrug resistance in *Klebsiella pneumoniae*: a novel  
394 gene, *ramA*, confers a multidrug resistance phenotype in *Escherichia coli*. *Microbiology*  
395 1995; **141**:1909-20.
- 396 2. Bailey AM, Ivens A, Kingsley R *et al*. RamA, a member of the AraC/XylS family, influences  
397 both virulence and efflux in *Salmonella enterica* serovar Typhimurium. *J Bacteriol* 2010;  
398 **192**:1607-16.
- 399 3. Chollet R, Chevalier J, Bollet C *et al*. RamA is an alternate activator of the multidrug  
400 resistance cascade in *Enterobacter aerogenes*. *Antimicrob Agents Chemother* 2004;  
401 **48**:2518-23.
- 402 4. De Majumdar S, Yu J, Fookes M *et al*. Elucidation of the RamA regulon in *Klebsiella*  
403 *pneumoniae* reveals a role in LPS regulation. *PLoS Pathog* 2015; **11**:e1004627.
- 404 5. Jiménez-Castellanos JC, Wan Ahmad Kamil WN, Cheung CH *et al*. Comparative effects of  
405 overproducing the AraC-type transcriptional regulators MarA, SoxS, RarA and RamA on  
406 antimicrobial drug susceptibility in *Klebsiella pneumoniae*. *J Antimicrob Chemother*  
407 2016; **71**:1820-5.
- 408 6. De Majumdar S, Yu J, Spencer J *et al*. Molecular basis of non-mutational derepression of  
409 *ramA* in *Klebsiella pneumoniae*. *J Antimicrob Chemother* 2014; **69**:2681-9.

- 410 7. Ruzin A, Immermann FW, Bradford PA. Real-time PCR and statistical analyses of *acrAB*  
411 and *ramA* expression in clinical isolates of *Klebsiella pneumoniae*. *Antimicrob Agents*  
412 *Chemother* 2008; **52**:3430-2.
- 413 8. Bratu S, Landman D, George A *et al.* Correlation of the expression of *acrB* and the  
414 regulatory genes *marA*, *soxS* and *ramA* with antimicrobial resistance in clinical isolates  
415 of *Klebsiella pneumoniae* endemic to New York City. *J Antimicrob Chemother* 2009;  
416 **64**:278-83.
- 417 9. Hentschke M, Wolters M, Sobottka I *et al.* *ramR* mutations in clinical isolates of  
418 *Klebsiella pneumoniae* with reduced susceptibility to tigecycline. *Antimicrob Agents*  
419 *Chemother* 2010; **54**:2720-3.
- 420 10. Rosenblum R, Khan E, Gonzalez G *et al.* Genetic regulation of the *ramA* locus and its  
421 expression in clinical isolates of *Klebsiella pneumoniae*. *Int J Antimicrob Agents* 2011;  
422 **38**:39-45.
- 423 11. Schultsz C, Geerlings S. Plasmid-mediated resistance in Enterobacteriaceae: changing  
424 landscape and implications for therapy. *Drugs* 2012; **72**: 1-16.
- 425 12. Tsai YK, Fung CP, Lin JC *et al.* *Klebsiella pneumoniae* outer membrane porins OmpK35  
426 and OmpK36 play roles in both antimicrobial resistance and virulence. *Antimicrob*  
427 *Agents Chemother* 2011; **55**:1485-93.
- 428 13. Clinical and Laboratory Standards Institute. Performance Standards for Antimicrobial  
429 Disk Susceptibility Tests – Ninth Edition: Approved Standard M2-A9. CLSI, Wayne, PA,  
430 USA, 2006.

- 431 14. Clinical and Laboratory Standards Institute. Performance Standards for Antimicrobial  
432 Susceptibility Testing: Twenty-fourth Informational Supplement M100-S24. CLSI, Wayne,  
433 PA, USA, 2014.
- 434 15. Bartolome B, Jubete Y, Martinez E *et al.* Construction and properties of a family of  
435 pACYC184-derived cloning vectors compatible with pBR322 and its derivatives. *Gene*  
436 1991; **102**:75–78.
- 437 16. Brem J, Cain R, Cahill S *et al.* Structural basis of metallo- $\beta$ -lactamase, serine- $\beta$ -lactamase  
438 and penicillin-binding protein inhibition by cyclic boronates. *Nat Commun* 2016;  
439 **7**:12406.
- 440 17. Avison MB, von Heldreich CJ, Higgins CS *et al.* A TEM-2- $\beta$ -lactamase encoded on an  
441 active Tn1-like transposon in the genome of a clinical isolate of *Stenotrophomonas*  
442 *maltophilia*. *J Antimicrob Chemother* 2000; **46**: 879-84.
- 443 18. Vinué L, Jové T, Torres C, Ploy MC. Diversity of class 1 integron gene cassette Pc  
444 promoter variants in clinical *Escherichia coli* strains and description of a new P2  
445 promoter variant. *Int J Antimicrob Agents* 2011; **38**:526-9.
- 446 19. Pridmore, R. New and versatile cloning vectors with kanamycin resistance markers.  
447 *Gene* 1987; **56**:309–12.
- 448 20. Coldham NG, Webber M, Woodward MJ *et al.* A 96-well plate fluorescence assay for  
449 assessment of cellular permeability and active efflux in *Salmonella enterica* serovar  
450 Typhimurium and *Escherichia coli*. *J Antimicrob Chemother* 2010; **65**: 1655-63.
- 451 21. Poirel L, Walsh TR, Cuvillier V, Nordmann P. Multiplex PCR for detection of acquired  
452 carbapenemase genes. *Diagn Microbiol Infect Dis.* 2011; **70**:119-23.

- 453 22. Woodford N, Fagan EJ, Ellington MJ. Multiplex PCR for rapid detection of genes  
454 encoding CTX-M extended-spectrum (beta)-lactamases. *J Antimicrob Chemother.* 2006  
455 **57**:154-5.
- 456 23. Talfan A, Mounsey O, Charman M, *et al.* Involvement of mutation in *ampD* I, *mrcA*, and  
457 at least one additional gene in  $\beta$ -lactamase hyperproduction in *Stenotrophomonas*  
458 *maltophilia*. *Antimicrob Agents Chemother.* 2013 **57**:5486-91.
- 459 24. Ile141Thr is wild-type
- 460 25. García-Sureda L, Juan C, Doménech-Sánchez A *et al.* Role of *Klebsiella pneumoniae* LamB  
461 Porin in antimicrobial resistance. *Antimicrob Agents Chemother* 2011; **55**:1803-5.
- 462 26. Ruiz E, Ocampo-Sosa AA, Rezusta A *et al.* Acquisition of carbapenem resistance in  
463 multiresistant *Klebsiella pneumoniae* strains harbouring *bla*<sub>CTX-M-15</sub>, *qnrS1* and *aac(6')*-Ib-  
464 *cr* genes. *J Med Microbiol* 2012; **61**:672-7.
- 465 27. Malinverni JC, Silhavy TJ. An ABC transport system that maintains lipid asymmetry in the  
466 gram-negative outer membrane. *Proc Natl Acad Sci U S A* 2009; **106**:8009-14.
- 467 28. Thong S, Ercan B, Torta F, *et al.* Defining key roles for auxiliary proteins in an ABC  
468 transporter that maintains bacterial outer membrane lipid asymmetry. *Elife.* 2016; **5**. pii:  
469 e19042.
- 470 29. Ekiert DC, Bhabha G, Isom GL, *et al.* Architectures of Lipid Transport Systems for the  
471 Bacterial Outer Membrane. *Cell* 2017; **169**:273-285.
- 472 30. Saw HT, Webber MA, Mushtaq S *et al.* Inactivation or inhibition of AcrAB-TolC increases  
473 resistance of carbapenemase-producing Enterobacteriaceae to carbapenems. *J*  
474 *Antimicrob Chemother* 2016; **71**:1510-9.
- 475

476 Table 1

| Antibiotic (µg)                   | pSU18 |    | IMP-1 |    | NDM-1 |    | VIM-1 |    | CTX-M1 |    | CMY-4 |    | KPC-3 |    | OXA-48 |    |
|-----------------------------------|-------|----|-------|----|-------|----|-------|----|--------|----|-------|----|-------|----|--------|----|
|                                   | Ecl8  | Δ  | Ecl8  | Δ  | Ecl8  | Δ  | Ecl8  | Δ  | Ecl8   | Δ  | Ecl8  | Δ  | Ecl8  | Δ  | Ecl8   | Δ  |
| Ampicillin (10)                   | 16    | 10 | 6     | 6  | 6     | 6  | 6     | 6  | 11     | 6  | 6     | 6  | 6     | 6  | 12     | 6  |
| Piperacillin (100)                | 29    | 25 | 27    | 22 | 9     | 6  | 22    | 15 | 15     | 6  | 17    | 14 | 8     | 6  | 28     | 26 |
| Piperacillin/<br>Tazobactam (110) | 32    | 26 | 30    | 22 | 8     | 6  | 22    | 15 | 30     | 25 | 25    | 20 | 16    | 8  | 30     | 28 |
| Cefotetan (30)                    | 32    | 30 | 15    | 6  | 14    | 6  | 30    | 22 | 30     | 28 | 17    | 14 | 21    | 13 | 31     | 27 |
| Cefoxitin (30)                    | 30    | 23 | 6     | 6  | 6     | 6  | 22    | 15 | 28     | 23 | 11    | 6  | 23    | 10 | 28     | 20 |
| Cefuroxime (30)                   | 32    | 22 | 6     | 6  | 6     | 6  | 12    | 6  | 16     | 6  | 6     | 6  | 6     | 6  | 30     | 21 |
| Cefotaxime (30)                   | 40    | 32 | 20    | 12 | 6     | 6  | 22    | 15 | 15     | 6  | 15    | 12 | 19    | 10 | 39     | 32 |
| Ceftriaxone (30)                  | 38    | 33 | 19    | 14 | 6     | 6  | 25    | 16 | 16     | 6  | 15    | 10 | 13    | 6  | 35     | 32 |
| Ceftazidime (30)                  | 33    | 30 | 15    | 6  | 6     | 6  | 19    | 11 | 20     | 15 | 13    | 7  | 14    | 6  | 31     | 29 |
| Cefoperazone (75)                 | 34    | 29 | 19    | 15 | 10    | 6  | 22    | 15 | 17     | 6  | 22    | 20 | 11    | 8  | 30     | 26 |
| Ceftizoxime (30)                  | 40    | 35 | 20    | 15 | 6     | 6  | 25    | 19 | 30     | 15 | 18    | 16 | 20    | 11 | 40     | 33 |
| Cefixime (5)                      | 33    | 29 | 14    | 6  | 6     | 6  | 18    | 6  | 16     | 6  | 6     | 6  | 17    | 6  | 31     | 27 |
| Cefepime (30)                     | 36    | 36 | 25    | 20 | 18    | 10 | 26    | 20 | 22     | 15 | 37    | 33 | 19    | 11 | 35     | 31 |
| Aztreonam (30)                    | 40    | 38 | 40    | 37 | 40    | 38 | 40    | 37 | 19     | 15 | 18    | 15 | 12    | 6  | 38     | 33 |
| Doripenem (10)                    | 30    | 30 | 20    | 18 | 15    | 10 | 23    | 21 | 30     | 30 | 26    | 26 | 16    | 16 | 28     | 28 |
| Ertapenem (10)                    | 30    | 30 | 20    | 15 | 10    | 6  | 26    | 20 | 29     | 22 | 23    | 20 | 17    | 9  | 24     | 22 |
| Imipenem (10)                     | 30    | 30 | 16    | 16 | 14    | 10 | 19    | 19 | 30     | 30 | 30    | 30 | 14    | 11 | 26     | 25 |
| Meropenem (10)                    | 30    | 30 | 18    | 15 | 8     | 8  | 23    | 20 | 30     | 30 | 31    | 31 | 18    | 12 | 30     | 27 |

477  
478  
479  
480  
481  
482

Assays were performed using Muller Hinton agar according to the CLSI protocol<sup>13</sup> for *K. pneumoniae* Ecl8 and Ecl8ΔramR (Δ). Values reported are the means of three repetitions rounded to the nearest integer. Zones confirming non-susceptibility are shaded grey. Susceptibility breakpoints are as set by the CLSI.<sup>14</sup>

483  
484  
485  
486

**Table 2. Significant Changes in Envelope Protein Abundance Seen in *Ecl8ΔramR* versus *Ecl8* During Growth in Both MHB and NB**

| Accession | Description                           | MHB            |             | NB             |             |
|-----------|---------------------------------------|----------------|-------------|----------------|-------------|
|           |                                       | <i>p</i> value | Fold Change | <i>p</i> value | Fold Change |
| A6T5M4    | AcrB                                  | 0.038          | 4.87        | 0.044          | 6.21        |
| A6T5M5    | AcrA                                  | 0.002          | 3.88        | 0.002          | 3.38        |
| A6T5Q5    | Putative Outer Membrane Protein       | <0.001         | 5.85        | <0.001         | 20.00       |
| A6T6W3    | Putative lipoprotein YbjP             | 0.001          | 5.30        | 0.002          | 7.01        |
| A6T721    | OmpK35                                | 0.007          | 0.43        | 0.026          | 0.23        |
| A6T7Z9    | ABC Transporter SapF                  | <0.001         | >20         | <0.001         | 20.00       |
| A6T8F9    | Heat shock protein HslJ               | <0.001         | >20         | <0.001         | 20.00       |
| A6T9Y7    | Putative uncharacterized protein YdhA | 0.021          | 6.17        | <0.001         | 20.00       |
| A6TCQ4    | OqxA                                  | <0.001         | >20         | <0.001         | 20.00       |
| A6TCQ5    | OqxB                                  | <0.001         | >20         | <0.001         | 20.00       |
| A6TCT2    | Putative Uncharacterized Protein      | 0.012          | 4.06        | <0.001         | 5.03        |
| A6TE24    | TolC                                  | 0.004          | 3.15        | 0.013          | 3.51        |

487  
488  
489  
490  
491  
492  
493  
494  
495  
496  
497  
498  
499  
500  
501  
502  
503  
504  
505  
506  
507

Methodology and details of data analysis are described in Supplementary Material

508 **Figure Legends**

509

510 **Figure 1: Effect of RamA Over-Production or *micF* Overexpression in *K. pneumoniae* Ecl8 on**  
511 **Envelope Permeability in Different Growth Media.**

512 The accumulation of H33342 dye over a 30 cycle (45 minute) incubation period by (A) *K.*  
513 *pneumoniae* Ecl8 $\Delta$ *ramR* compared with Ecl8 (set to 100%) grown in (solid line) NB and (dashed  
514 line) MHB. (B) *K. pneumoniae* Ecl8(*micF*) compared with Ecl8(control) (set to 100%) grown in  
515 MHB. Each line shows mean data for three biological replicates with 8 technical replicates in  
516 each, and error bars define the standard error of the mean (SEM).

517



**Figure 1**

**A**

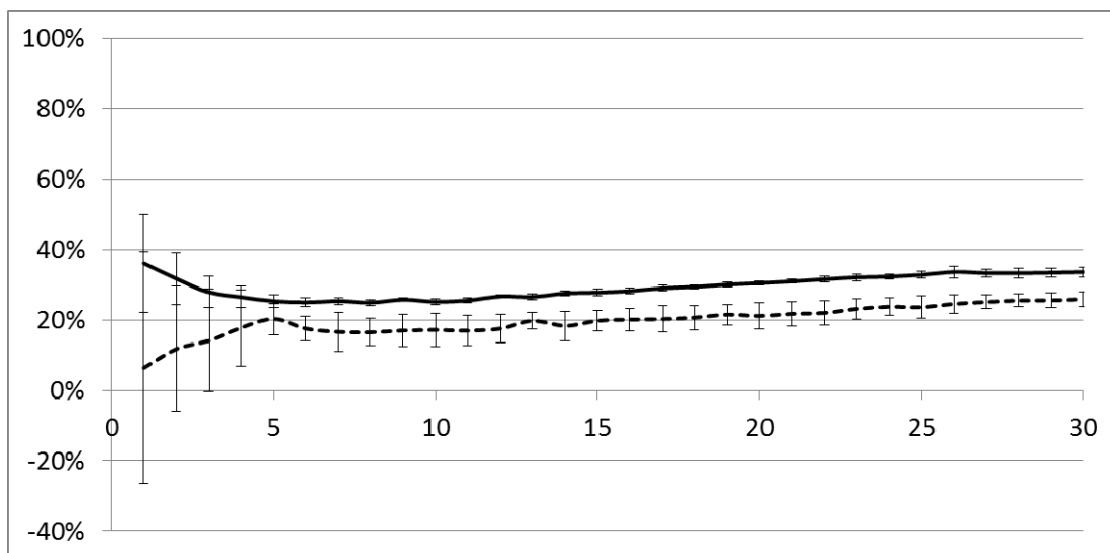

**B**

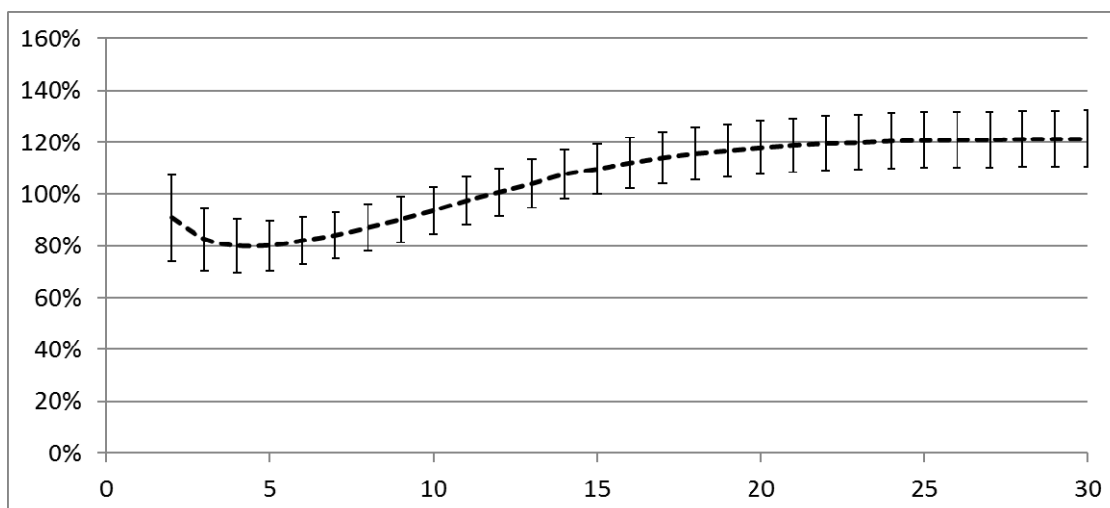

Source: https://www.biorxiv.org/content/10.1101/133918v1.full.pdf
